# Supplementary material
Source: PubMed Central journal article supplement (PMC3630251)

Figure E2

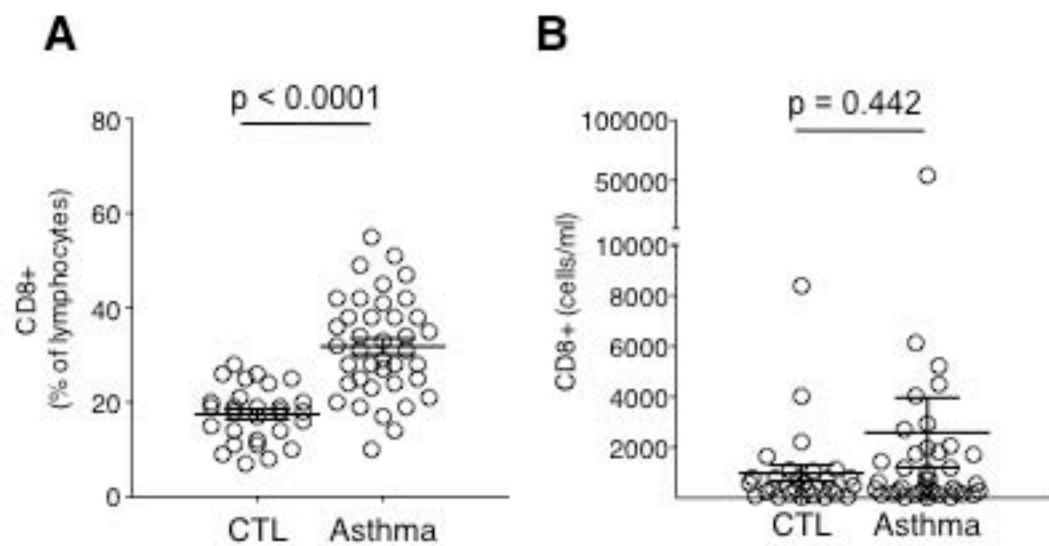

Figure E3

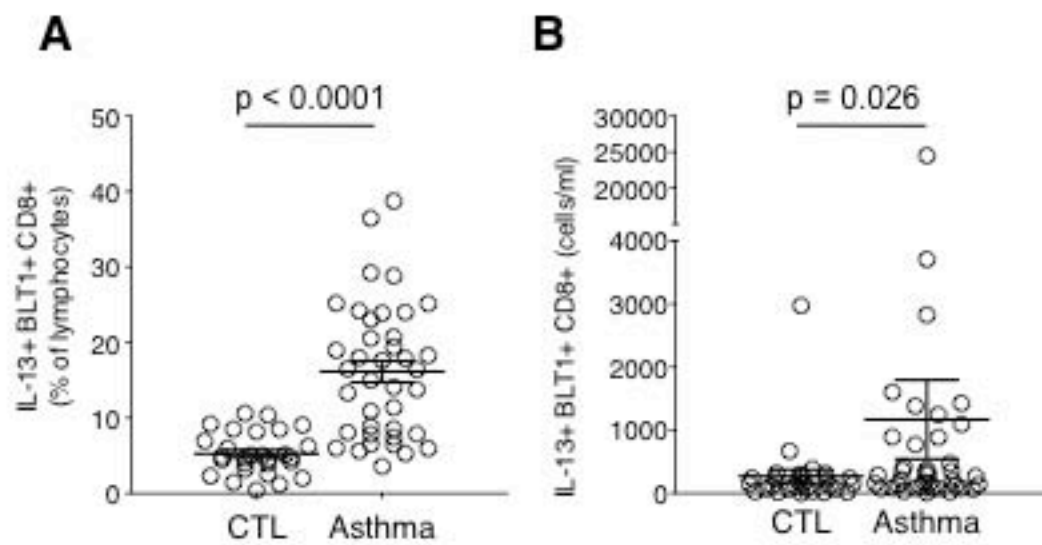

Figure E4

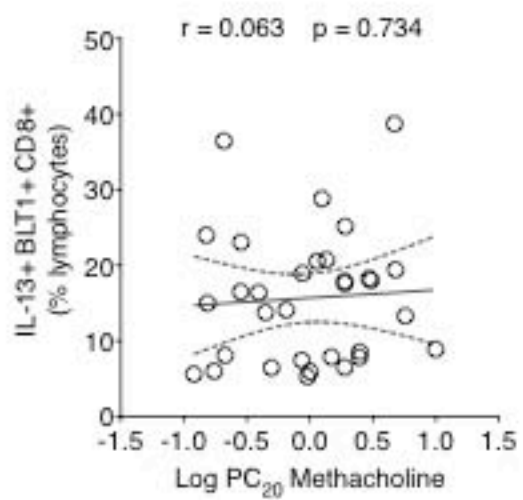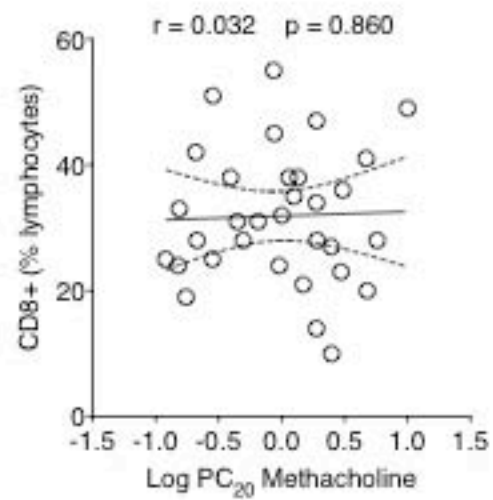

Figure E5

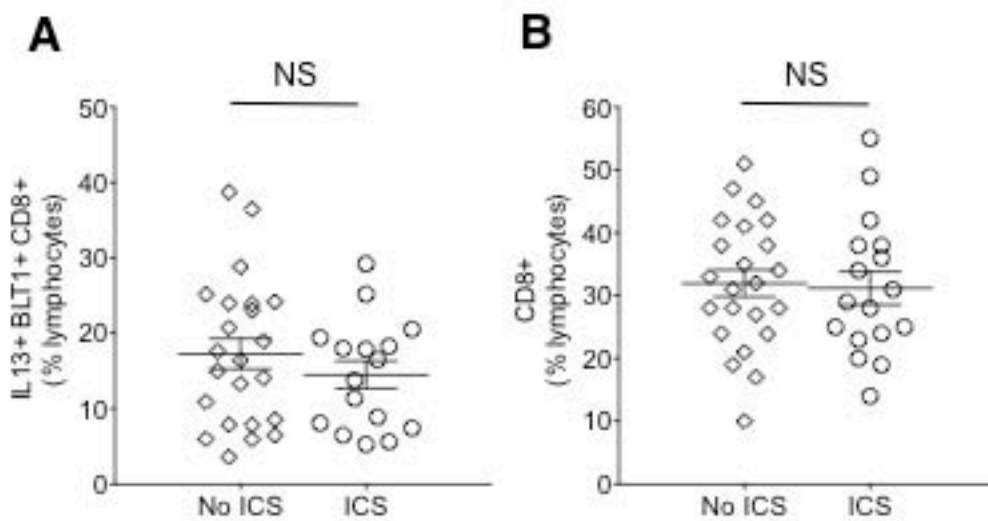

Figure E6

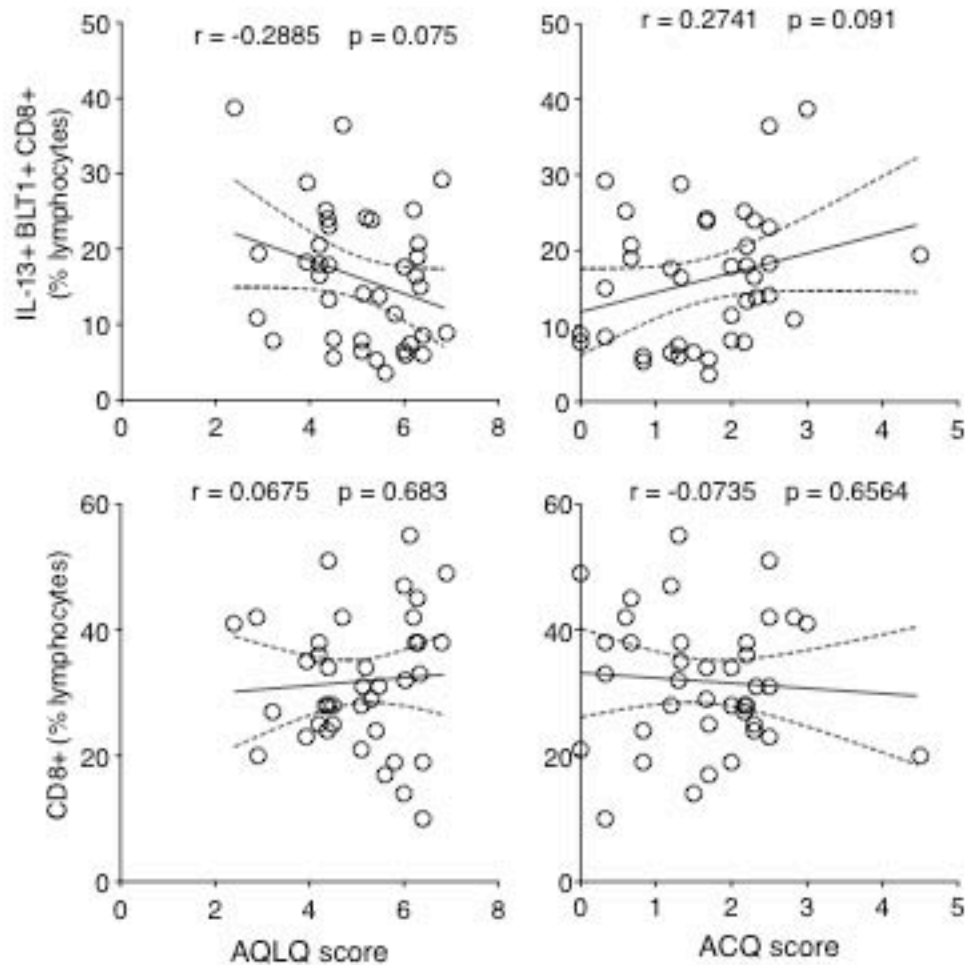

Supplement: NIHMS439896-supplement-Supp_Fig_S2-S6.pdf [file NIHMS439896-supplement-Supp_Fig_S2-S6.pdf]
